# Supplementary material
Source: MDPI journal article supplement (https://www.mdpi.com/2077-0472/14/5/763)
Supplement: s1 [file s1]

**Supplementary material Table S1** Oligonucleotide primer of selected genes for qRT-PCR.

| <b>Genes</b>    | <b>Sense-primer</b>      | <b>Anti- primer</b>       |
|-----------------|--------------------------|---------------------------|
| <i>PtROP1</i>   | ACACCAGCAACACTTTCC       | CTTGTCCAGCAGTATCCC        |
| <i>PtROP 2</i>  | GAACAGGGGAGTATGTCGTCTAAT | GCTTGTGGCGTAGGTGCT        |
| <i>PtROP9</i>   | ACACCAGCAACACTTTCCCA     | CCACTTCTTGGCGACATTTT      |
| <i>PtLRX1</i>   | CGCCTGAAGCTGCTGTACG      | AAACTCGTTGAATCGAAGGTCC    |
| <i>PtCPC</i>    | GGAAGCAAGCCAAGACCACTAC   | CGGCAATCAGAGCCCCACCT      |
| <i>PtTRY</i>    | GGAAGCAAGCCAAGACCACTAC   | CGGCAATCAGAGCCCCACCT      |
| <i>PtWER</i>    | GAGCCCAAATGTGAACCG       | CTTCCAGGCACTCGTTTT        |
| <i>PtGL2</i>    | CAACCCACCACTTCTCG        | CTCCACTGCCTTCATATCCTTCCTC |
| <i>PtTTG</i>    | AACTCTTCATCACGCAAATCCTC  | TTCTCTTGGGTTCAATCTCGTTC   |
| <i>PtFER</i>    | GGCGTCAGCAACTAACAG       | TTGGGTTTAAGGCTGGTC        |
| <i>PtCASTOR</i> | GGAACCTGCCATGCAATTAA     | CTACCGACATCGCCCTCA        |
| <i>PtCYCLOP</i> | ATTGGTTTGCCCGTGC         | TGTCCTCCGTGATGCTTGT       |
| <i>PtDMI1</i>   | AGTGACCTTGACAATGAACCCC   | TCATCAACCGCCCAATCA        |
| <i>PtDMI2</i>   | TGCTTTAACTGACCCGAACA     | CAAACACCCCTTTGCCCTG       |
| <i>PtDMI3</i>   | TAGCAATCAAAACCCTCCGAC    | AGGCATCTGACACCGAAACC      |
| <i>PtNUP85</i>  | GACAAACCCCTCCAAAGCCC     | CGAGATGCCGAGCCGAGA        |
| <i>PtNUP133</i> | GTCATCGCTGCGGGTAAG       | CGAAGGAGTGGTCCTCCAAC      |
